# Supplementary material for: Abnormal electrophysiological phenotypes and sleep deficits in a mouse model of Angelman Syndrome
Source: PubMed Central journal article supplement (PMC7866697; doi:10.1186/s13229-021-00416-y), 2021-02-06

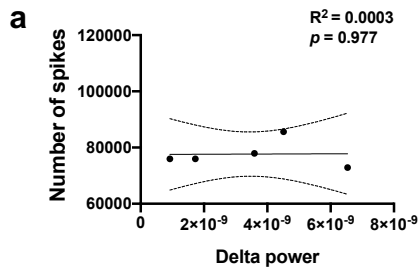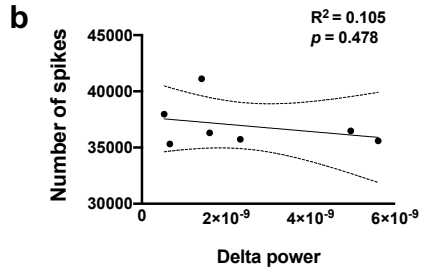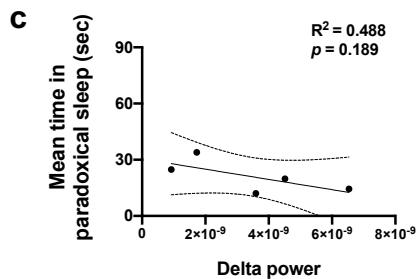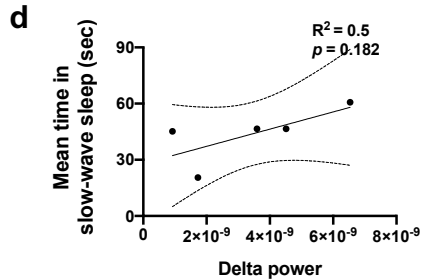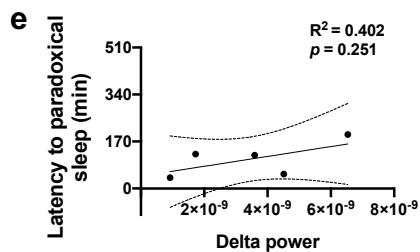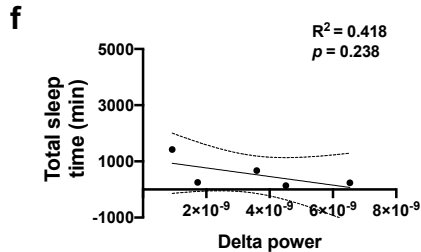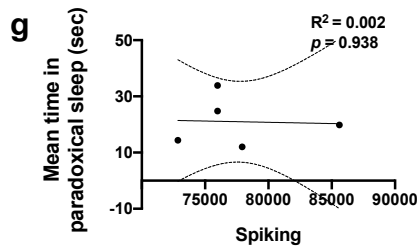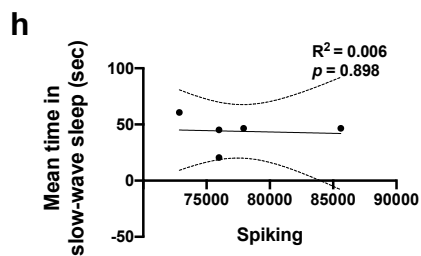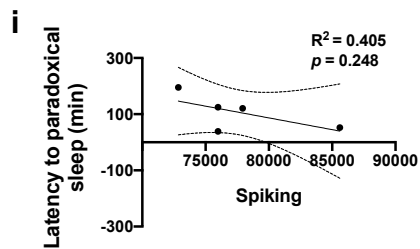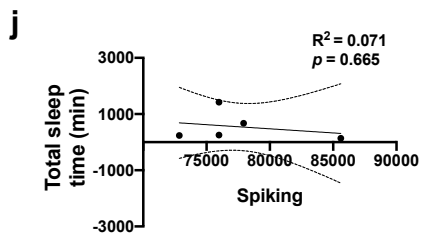

Supplement: 13229_2021_416_MOESM2_ESM.pdf [file 13229_2021_416_MOESM2_ESM.pdf]
